# Supplementary material
Source: ML conference proceedings conference paper supplement (https://openreview.net/forum?id=EGRDoPU0Lq)
Supplement: supplementary_material [file attachment]

---

## A APPENDIX

---

### Algorithm 1: Algorithm for EAP

---

**Input:**

- $N$ : Number of iterations
- $\alpha, \gamma$ : Model coefficients of the trained SVM
- $[\mathbf{x}_1, \mathbf{x}_2, \dots, \mathbf{x}_s]$ : Support vectors of the trained SVM
- $[\mathbf{x}_1, \mathbf{x}_2, \dots, \mathbf{x}_n]$ : Training data
- $cth$ : The minimum changes

**Output:**

- $\mathbf{x}^*$ : Explanation vector

```

// Estimate pattern in kernel space
1 Calculate centre matrix  $\mathbf{H} = \mathbf{I}_n - \frac{1}{n} \mathbf{1}_n$  ;
2 for  $i = 1:n$  do
3   for  $j = 1:s$  do
4     Calculate the element  $\mathbf{F}\mathbf{S}^T = \mathbf{k}(\mathbf{x}_i, \mathbf{x}_j)$  at row  $i$  and column  $j$  using the kernel function
       with  $\gamma$  used by the model.;
5      $j++$  ;
6   end
7    $i++$  ;
8 end
9 Calculate the coefficient of estimated pattern  $\mathbf{P} = \frac{1}{n} \mathbf{H}\mathbf{F}\mathbf{S}^T \alpha$ . The estimated pattern in kernel
   space is  $\sum_{i=1}^n \mathbf{p}_i \phi(x_i)$ .
// Mapping the estimated pattern into kernel space
10  $\mathbf{t} \leftarrow 0$  ;
11  $\mathbf{x}_0^* \leftarrow$  initialised from standard normal distribution;
12  $\mathbf{diff} \leftarrow 1$ ;
13 while ( $\mathbf{t} \leq N$ ) AND ( $|\mathbf{diff}| < cth$ ) do
14    $numerator \leftarrow 0$ ;
15    $denominator \leftarrow 0$ ;
16   for  $i = 1:n$  do
17      $numerator = numerator + \mathbf{p}_i \mathbf{k}(\mathbf{x}_i, \mathbf{x}_{t-1}^*) \mathbf{x}_i$  ;
18      $denominator = denominator + \mathbf{p}_i \mathbf{k}(\mathbf{x}_i, \mathbf{x}_{t-1}^*)$  ;
19      $i++$  ;
20   end
21    $\mathbf{x}_t^* = \frac{numerator}{denominator}$  ;
22    $\mathbf{L}_t = \text{MSE}(\mathbf{x}_t^*)$ ;
23   if  $\mathbf{t} > 1$  then
24      $\mathbf{diff} = \frac{\text{MSE}(\mathbf{x}_{t-1}^*) - \text{MSE}(\mathbf{x}_t^*)}{\text{MSE}(\mathbf{x}_{t-1}^*)}$ 
25   end
26    $\mathbf{t}++$ ;
   // Log 3 different solutions with the smallest loss
27    $\mathbf{x}_{l1}^*, \mathbf{x}_{l2}^*, \mathbf{x}_{l3}^* \leftarrow$  log three solutions with the most minor loss score during the iteration. ;
28 end
29  $\mathbf{x}_{l1}^*, \mathbf{x}_{l2}^*, \mathbf{x}_{l3}^* \leftarrow$  calculate the absolute value and normalised. ;
30  $\mathbf{x}^* = (\mathbf{x}_{l1}^* + \mathbf{x}_{l2}^* + \mathbf{x}_{l3}^*)/3$ 

```

---
